# Supplementary material
Source: publisher site journal article supplement (https://www.dovepress.com/article/521964)
Supplement: Supplementary file 1 [file 521964%20%252509Supplementary%20Tables.docx]

Supplementary Table 1 The distribution of ESGE classifications among the three different endometrial preparation protocols

| ESGE classification | HRT | GnRHa+HRT | OS | P-value |
| --- | --- | --- | --- | --- |
| Mild (I) | 16(61.5%) | 7(26.9%) | 3(11.5%) | 0.670 |
| Moderate (II-III) | 61(70.9%) | 15(17.4%) | 10(11.6%) |
| Severe(IV-V) | 10(66.7%) | 2(13.3%) | 3(20.0% |

ESGE, European Society of Gynecological Endoscopy; HRT, hormone replacement therapy; OS, ovarian stimulation; GnRHa, gonadotropin-releasing hormone agonist.

Supplementary Table 2 The association between age and endometrial pattern

|  | Triple line | Partial triple line | No triple line | P-value |
| --- | --- | --- | --- | --- |
| n | 50 | 10 | 74 | 0.068 |
| Age (years old) |  |  |  |
| < 37 | 47（94.0%） | 10 （100.0%） | 60（81.1%） |
| ≥37 | 3 (6.0%) | 0 （0%） | 14（18.9%） |
